# Supplementary material
Source: publisher figshare collection journal article supplement (https://sage.figshare.com/ndownloader/files/14949284)
Supplement: Supplementary file 1 [file 14949284]

Da euforia ao retrocesso:

O comportamento do emprego formal no Brasil no período recente

Jacqueline Aslan Souen e Guilherme Caldas de Souza Campos

Nos anos 1990, o mercado de trabalho no Brasil foi caracterizado pelos altos níveis de desemprego e pelo predomínio da informalidade. Pressionados por políticas neoliberais, privatizações, abertura comercial e financeira indiscriminada e pela reestruturação produtiva, os trabalhadores brasileiros que perdiam seus empregos eram obrigados a buscar formas alternativas para sobreviver, fosse com os poucos empregos informais disponíveis, fosse com o trabalho por conta-própria, ambos caracterizados pela grande precarização e baixas remunerações. Em suma, o mercado de trabalho no Brasil passou por uma grande desregulamentação que, paulatinamente, levou a um profundo processo de desestruturação nos anos 1990. Este processo fez da condição de formalidade do emprego um privilégio para poucos trabalhadores, que podiam desfrutar de direitos trabalhistas e sociais básicos, conferidos pela condição de formalidade.

Esta situação só começou a se reverter no início dos anos 2000 com a desvalorização da moeda nacional e o crescimento das exportações, criando as condições para a retomada do crescimento do emprego nos setores exportadores. No entanto, a retomada do mercado interno só se deu com o aquecimento da demanda agregada, a partir de 2003/2004, o que viabilizou uma trajetória continuada de crescimento do emprego e da renda. Este processo inaugurou uma fase de forte crescimento da ocupação formal, queda do desemprego e retração da informalidade, caracterizando um período de reestruturação do mercado de trabalho que persistiu por quase uma década.

O avanço do mercado de trabalho neste período deve ser entendido levando em conta o intenso crescimento do emprego formal e da formalização da economia, registrando níveis bastante superiores comparativamente à variação do Produto Interno Bruto (PIB) no período. O PIB médio anual de 5,1% entre 2003 e 2008, calculado entre os meses de setembro - de modo a evitar a forte retração do último trimestre de 2008 com a crise externa - ficou abaixo da variação média anual da taxa de emprego formal, que foi de 6,8%, segundo a Relação Anual de Informações Sociais (Annual Report of Social Information, RAIS)[[1]](#endnote-2). Essa desproporcionalidade seria ainda maior conforme o índice oficial do PIB de 4,8% ao ano. Ou seja, uma determinada configuração do mercado internacional, aliada a uma dada estratégia interna de crescimento, promoveu um forte aumento do consumo e do investimento que gerou um crescimento razoável do PIB, porém provocou uma elevação muito mais intensa do emprego formal e da formalização das empresas, de forma desproporcional ao aumento do produto, e mais desproporcional ainda em relação ao produto industrial (3,9% aa).

Com a retomada da economia, em 2004, inicialmente dinamizada pelo boom de commodities com a forte demanda do mercado externo, sobretudo o mercado asiático, ocorreu um maior estímulo às contratações formais, principalmente em razão do aumento de capacidade produtiva nas médias e grandes empresas - dominantes no setor exportador – alterando a baixa relação emprego formal/PIB dos anos 1990. Esse quadro de aumento do emprego com carteira foi sendo realimentado pela continuidade do bom desempenho do produto, impactado pela elevação do consumo e do investimento, num processo virtuoso que se retroalimentou com o maior gasto das famílias e das empresas, que se ampliou também devido ao aumento do crédito de mais longo prazo[[2]](#endnote-3). Ademais, a partir de uma postura do governo no sentido de promover a maior inclusão da base da pirâmide social, através de uma série de políticas públicas, elevou-se a capacidade de consumo das famílias de baixa renda, dinamizando os serviços e comércio locais - com destaque para os pequenos e médios municípios de regiões mais pobres, como o Nordeste do país -, além de estimular a formalização dos contratos nesses pequenos estabelecimentos (Cardoso Jr, 2007; Castro, 2013; Cardoso Jr & Hamasaki, 2014; Oliveira, 2014). Dentre as políticas públicas empreendidas, podemos citar, por exemplo, o aumento do valor real do salário mínimo (Souen, 2013); a instituição de Benefícios de Prestação Continuada (Benefits of Continued Provision, BPC)[[3]](#endnote-4); a criação do programa Bolsa-Família[[4]](#endnote-5); ampliação do acesso ao crédito para consumo; apoio a agricultura familiar; ampliação das linhas de crédito do Banco Nacional de Desenvolvimento Econômico e Social (National Bank for Economic and Social Development, BNDES) e o fortalecimento do combate ao trabalho forçado e trabalho infantil.

Dessa forma, num efeito de retroalimentação, o movimento de aumento do emprego formal e da renda, bem como a melhora na distribuição desta (Souza Campos, 2015), reforçaram a ampliação da formalização da economia, pois não somente possibilitaram a elevação do consumo da base da pirâmide social - com forte propensão ao consumo -, dinamizando os pequenos negócios, como também alteraram o padrão de consumo, deslocando este para bens e serviços ofertados por estabelecimentos mercantis e levando a um crescimento do emprego em empresas maiores e mais estruturadas. Nesse cenário, as alternativas de subemprego cederam lugar a empregos assalariados formais, e os próprios trabalhadores passaram a demandar maior formalização, num ambiente de fortalecimento da atuação sindical, de forma a garantir os direitos associados ao emprego formal, o que também contribuiu para elevar as oportunidades de acesso ao crédito (Medeiros, 2015; Cardoso Jr & Hamasaki, 2014; Krein & Santos, 2012: p. 67).

Nos anos recentes, o arrefecimento do crescimento econômico desde 2014 e seu agravamento com a recessão de 2015, associado ao contexto de profunda crise político-institucional em que se encontra o país, vêm ameaçando profundamente este processo de reestruturação do mercado de trabalho. Desde 2015, os indicadores conjunturais do mercado de trabalho começaram a apresentar resultados negativos para o emprego formal, o que não se observava desde os anos 1990, bem como um forte crescimento da taxa de desemprego. Esta reversão do mercado de trabalho coloca em xeque as conquistas sociais do período recente, configurando-se como uma ameaça ao crescimento econômico que se deu com inclusão social pela via do crescimento das ocupações formais e da maior estruturação da economia.

Este artigo visa analisar a trajetória do mercado de trabalho brasileiro no período recente, dando ênfase na evolução do emprego formal. A primeira parte analisa o período de crescimento do emprego formal e de estruturação do mercado de trabalho, descrevendo o seu comportamento antes e depois da crise financeira mundial de 2008. A segunda parte trata do período recente, onde se verifica retração do emprego geral e crescimento da participação de outras posições na ocupação que não o emprego formal, bem como do crescimento da taxa de desemprego.

*I. A evolução do emprego formal*

*1.1 Aceleração da atividade econômica e do emprego formal (2003 – 2008)*

O avanço do processo de reestruturação do mercado de trabalho com forte crescimento do emprego formal deve ser compreendido dentro de uma perspectiva de mudança do modo de funcionamento da economia, num movimento de alteração dos preços relativos que se deu a partir de uma dada dinâmica que resultou na valorização da moeda nacional[[5]](#endnote-6). O real apreciado, além de favorecer o crescimento da economia sem pressões inflacionárias, contribuiu para a recuperação do poder de compra dos salários, viabilizando o forte crescimento da demanda. Esses dois efeitos, a valorização dos salários e a baixa inflação, foram possíveis, por um lado, devido ao menor custo de produção, na medida do barateamento dos preços dos insumos importados, por outro, em virtude do menor preço dos bens finais importados. Esse processo, por sua vez, implicou num dado modelo de crescimento que acarretou numa alteração da dinâmica do mercado de trabalho no sentido de uma trajetória de maior estruturação, com o forte aumento do emprego formal e da formalização dos estabelecimentos, em simultâneo a diminuição das outras posições na ocupação.

Esse modo de funcionamento da economia, assentado na moeda doméstica sobrevalorizada, conformou uma dada estrutura de preços relativos entre os setores *Tradables* e os não *Tradables[[6]](#endnote-7)* em que os preços nos setores *Tradables* tiveram forte queda, diferentemente dos preços nos setores não *Tradables,* ou mesmo nos setores *Tradables* que apresentaram maior vantagem comparativa, em que os preços caíram menos. Esse diferencial de preços entre os setores favoreceu os não *Tradables* que, num cenário de demanda doméstica aquecida, puderam ampliar a capacidade instalada, elevar a formalização e gerar mais emprego, bem como pagar melhores salários. Assim, num movimento virtuoso que foi se retroalimentando, a queda de inflação, o avanço do emprego formal e a redução do desemprego provocaram um aumento nominal dos rendimentos do trabalho, acima da inflação que, associado aos aumentos reais obtidos a partir dos aumentos do salário mínimo (Dedecca & Lopreato, 2013; Souen, 2013) e dos salários das categorias (DIEESE, 2012; Krein & Teixeira, 2014), sustentou a elevação da capacidade de compra dos salários. A melhora da renda do trabalho, por sua vez, impactou positivamente na demanda, promovendo a ativação, principalmente, dos setores que não competem com o produto externo, ou seja, os não *Tradables*. Nesse processo, parte dos estabelecimentos mais precários que geravam pouco emprego formal diminuiu, outra parte avançou e tendeu a maior estruturação e formalização, gerando mais vagas formais. Ademais, também houve ampliação dos estabelecimentos melhor estruturados, que empregam com registro em carteira de trabalho.

Cabe ainda sublinhar que esse processo de crescimento da formalização e maior estruturação da economia fora reforçado mediante um novo marco do setor público, iniciado desde final dos anos 1990, no sentido de ampliar a fiscalização – o objetivo era elevar a arrecadação para garantir o superávit das contas públicas –, através da intensificação da atuação da Receita Federal e da intervenção das três instituições públicas da área do trabalho para o cumprimento da lei, a saber: Ministério do Trabalho e Emprego, Ministério Público do Trabalho e Justiça do Trabalho (Cardoso Jr., 2007; Simão, 2009), impondo limites ao poder discricionário dos patrões e à liberdade de atuação do capital[[7]](#endnote-8).

Dessa forma, o forte crescimento da geração de vagas formais de trabalho, juntamente com a maior formalização da economia, num movimento bastante desproporcional, comparativamente ao crescimento do PIB, teve a ver com esse processo mais amplo ocorrido na economia entre 2003 e 2008, com forte crescimento do consumo e do investimento, em simultâneo a um movimento de valorização da moeda nacional – reforçada ainda pelo diferencial entre a taxa de inflação brasileira (mesmo levando em conta o movimento de queda) e a taxa internacional. Num processo que se retroalimentou, devido a maior capacidade de consumo dos salários, elevou-se a demanda dos segmentos não *Tradables*, que apresentaram crescimento considerável de suas atividades, como foi o caso, por exemplo, da construção civil; comércio e reparação; alojamento e alimentação; transporte, armazenagem e comunicação; atividades imobiliárias etc., com forte geração de emprego formal e maior estruturação, superando o desempenho do crescimento da economia.

O intenso crescimento do emprego formal e a maior formalização entre 2003 e 2008, portanto, fora consequência de um modo de funcionamento da economia caracterizado, sobretudo, pela extraordinária melhora da atividade nos setores não *Tradables*, e mesmo nos *Tradables* em que possuímos maior vantagem competitiva. Porém, essa forma de crescimento da atividade econômica, com o real sobrevalorizado, por longo período e que gerou muito emprego formal, implicou num PIB relativamente baixo, comparativamente ao forte crescimento do consumo e também do investimento. A explicação para tal desempenho guarda relação com o fato de que grande parte da demanda interna fora jogada para o mercado externo, movimento perceptível conforme os índices de forte penetração das importações que foram excedendo amplamente as exportações, chegando quase a dobrar o coeficiente importado ao final da primeira década dos 2000, apesar do saldo comercial ainda positivo até 2013[[8]](#endnote-9) (Santos, 2013; Medeiros, 2015).

Ou seja, parte do dinamismo que o processo de valorização da moeda permitiu também causou um movimento de perda do potencial dinâmico do mercado interno gerado pela elevação da demanda agregada, que fluiu para o mercado externo, prejudicando, sobretudo, o setor produtivo e causando uma diminuição do saldo de comércio ao longo do período. Esse efeito de “fuga para fora”, portanto, implicou numa taxa de crescimento média anual do PIB de 5,1%, o que equivaleu a 23,5% a menos do que a taxa de crescimento médio anual do emprego formal que, segundo dados da RAIS, foi de 6,3%, e num produto industrial de 3,9% no período em questão. Essa forma de crescer, no entanto, ainda que com desempenho moderado do PIB, resultou numa fortíssima elevação do emprego formal e da formalização da economia.

Cabe sublinhar ainda que, a despeito desse processo de fuga para fora, até 2008, antes da crise internacional, impactando nossa estrutura produtiva, o setor da indústria de transformação apresentou maior estruturação e variação considerável da taxa de emprego formal, de 40,0%, particularmente os segmentos que não sofreram a forte concorrência da importação de bens finais, como foi o caso da metalurgia, química, material de transporte, máquinas e equipamentos e produtos de metal que, mesmo com muita importação, foram basicamente importações de partes e componentes, significando muita montagem ou mesmo processamento interno, e, portanto, muita geração de emprego. Diferentemente do que ocorreu, por exemplo, com o setor têxtil, o setor de calçados, e o segmento de madeira e móveis que, como fornecedores de bens finais, sofreram diretamente o impacto dos produtos finais importados.

*1.2 Desaceleração da atividade econômica e do emprego formal (2008 – 2013)*

O contexto econômico favorável se alterou com a crise financeira internacional de outubro de 2008. A partir de então, as condições do mercado externo e interno sofreram transformações que levaram a um arrefecimento do ritmo de crescimento da economia brasileira com desaceleração da demanda, principalmente do investimento, com consequências negativas para o mercado de trabalho. Porém, ainda que o ritmo de crescimento do emprego formal tenha diminuído quase a metade, a queda foi muito menos intensa do que a retração do ritmo de crescimento do PIB, fazendo com que a desproporcionalidade entre a variação do emprego formal e do PIB se verificasse ainda de forma mais pronunciada do que no período anterior. Sendo assim, é possível dizer que a relação entre o emprego formal e o PIB foi mais elevada ainda entre 2008 e 2013, comparativamente ao período precedente.

O ritmo de crescimento da economia brasileira foi bastante prejudicado pela crise financeira internacional de 2008, ainda que no imediato pós-crise as providências anticíclicas do governo Lula (Barbosa & Souza, 2010) tenham possibilitado a rápida reversão do cenário recessivo que se aguardava. Já em fins de 2008 iniciou-se uma massiva fuga de capitais, retração do crédito, doméstico e internacional, e redução do preço das commodities, diante da retração da demanda externa, ocorrendo forte retração do PIB no primeiro semestre de 2009, ano que finda com uma queda do produto da ordem de 0,2%. Nesse contexto ocorreram a retração das exportações e a desvalorização da moeda nacional, afetando a confiança dos agentes econômicos e rebatendo no consumo e na atividade produtiva. Esse fato teve como consequência um cenário de recessão técnica nos seis primeiros meses de 2009, o que não poderia deixar de afetar o mercado de trabalho, a partir das demissões massivas e considerável queda dos níveis de emprego, sobretudo no setor manufatureiro.

O quadro recessivo foi prontamente enfrentado pelo governo federal, com medidas anticíclicas, fiscal e monetária, para compensar a contração abrupta do crédito externo. Isso foi possível graças ao elevado nível das reservas internacionais (US$ 210 bilhões à época) que permitiram ao governo uma rápida operação para a expansão da liquidez, tanto no mercado cambial, como no âmbito do mercado doméstico, o que evitou o contágio da retração da liquidez internacional no mercado interbancário nacional. Além disso, expandiu-se o crédito de curto prazo para o setor produtivo em geral, via BNDES, e para outros setores fortemente fragilizados, como agropecuária, construção civil, produção de insumos básicos e a comercialização e produção de duráveis, via Banco do Brasil (Bank of Brazil) e Caixa Econômica Federal (Federal Savings Bank) (Barbosa & Souza, 2010).

Tais iniciativas foram ainda complementadas pela implementação de um conjunto de desonerações tributárias temporárias, que estimulou as vendas e o consumo, iniciando pela redução do Imposto sobre Produtos Industrializados (IPI) para o setor automotivo em fins de 2008, medida que se estendeu no decorrer de 2009, atingindo outros segmentos, a saber: eletrodomésticos, setor moveleiro, material de construção, motocicletas e mesmo alguns itens alimentícios. E, com a mesma lógica anticíclica, o governo federal promoveu transferências orçamentárias consideráveis aos estados e municípios, atingindo algo em torno de 0,2% do PIB em 2009 (Barbosa & Souza, 2010).

Todas essas medidas, a despeito da forte queda inicial do PIB, do crédito dos bancos privados e dos lucros, sustentaram o consumo das famílias e garantiram capital às empresas. Ademais, já no segundo semestre de 2009, ocorreu melhora do cenário internacional, com retorno do fluxo de capital externo, recuperação dos preços das commodities, apreciação do real, queda da inflação e da taxa de juro. Sendo assim, foi possível a rápida recuperação da economia e do mercado de trabalho brasileiros com a reversão da retração do emprego formal, que voltou a crescer rapidamente nas seis regiões metropolitanas, já na segunda metade de 2009, superando o pico pré-crise no mês de novembro do mesmo ano (OIT, 2011: p. 20-22).

A rápida intervenção do governo federal, portanto, não somente reverteu as condições ruins do cenário econômico, acelerando a recomposição da demanda já no segundo semestre de 2009, como viabilizou um quadro de expectativas favoráveis dos agentes econômicos, internos e externos, o que refletiu num ótimo resultado para o PIB de 2010, com elevação de 7,5%. Contudo, os estímulos à demanda significaram muito pouco em termos de aumento da produção manufatureira, uma vez que sua ampliação total, entre 2008 e 2010, de 0,3% ao ano, correspondeu a 1,0% do total do PIB. Esse desempenho foi ainda pior entre 2010 e 2012, quando a manufatura apresentou variação anual negativa de 1,3%. Nesse quadro, o que sustentou o crescimento do PIB e do emprego foram os setores não manufatureiros, ainda que numa trajetória de redução do ritmo de crescimento – seja da atividade econômica, bem como da geração de emprego – uma vez que, conforme dados do Sistema de Contas Nacionais (System of National Accounts, SCN), entre 2006-2008, esses setores cresceram 5,9% ao ano, entre 2008-2010 o aumento foi de 4,1%, e entre 2010-2012 a variação anual foi de 2,3% (IBGE, 2011). Sendo assim, conforme dados do Instituto de Pesquisa Econômica Aplicada (Institute of Applied Economic Research, IPEADATA), em 2011 o produto total da economia arrefeceu, com um crescimento de 2,7%, e continuou em queda em 2012, com aumento de apenas 1,0%. Quanto à geração de emprego, o conjunto dos principais setores não *Tradables* que, entre 2003 e 2008 apresentaram crescimento médio anual de 7,5% para o emprego formal, entre 2008 e 2013 registraram aumento de 6,1% ao ano[[9]](#endnote-10).

O fraco desempenho da produção manufatureira teve forte relação com o ciclo de elevação da taxa básica de juros. A taxa de juros, que vinha em uma trajetória de rápida queda desde janeiro de 2009, caindo de 13,8% a 8,8% em setembro, voltou a crescer, alcançando 12,5% em um período de dois anos, de setembro de 2009 a setembro de 2011 (IPEADATA), bem como, com a adoção das medidas macro prudenciais para conter o crédito, sobretudo no setor de veículos, em fins de 2010 (FUNDAP, 2011). A estratégia era conter a demanda agregada, ante o recrudescimento da inflação em meados de 2010[[10]](#endnote-11) - a partir de um diagnóstico de inflação de demanda -, e de fazer o ajuste fiscal para cumprir a meta de superávit primário, de 3,1% do PIB (FUNDAP, 2012; Serrano & Summa, 2012). Nesse processo, houve considerável redução do gasto público que passou de 4,2% entre 2009 e 2010 para 1,9% entre 2010 e 2011. Quanto ao investimento do setor público, houve queda de 12% em termos reais no mesmo período, frente a um crescimento médio de 16,2% entre 2004 e 2010, e os investimentos das empresas estatais caíram 8,6%, ante uma elevação média de 14% entre 2004 e 2010. Diante disso, o ano de 2011 foi marcado por queda do ritmo de crescimento em todos os segmentos do setor privado em comparação com o mesmo período de 2010. O pior desempenho ficou com o setor da indústria de transformação, que registrou um crescimento de 10,4% em 2010 contra um crescimento de apenas 1,6% em 2011. Assim como a indústria de transformação, a construção civil também apresentou uma forte queda de 11,7% para 3,6%. Outros setores que registram fortes quedas, mas em menor proporção, foram os setores de agricultura, que caiu de 6,3% para 3,9%, e o setor de serviços, que passou de 5,5% para 2,7% (IPEADATA).

Pela ótica da demanda, confirmou-se a retração da absorção interna com o arrefecimento do consumo das famílias, considerando o crédito mais caro e o elevado grau de endividamento e maior comprometimento do orçamento familiar com juros e amortizações. O crescimento do consumo das famílias que fora de 7% entre 2009 e 2010, apresentou variação de 4,1% entre 2010 e 2011. O ritmo de crescimento do investimento teve queda ainda maior, considerando o forte aumento de 21,3% de 2009 para 2010, o resultado de 2010 para 2011 foi bastante tímido, registrando aumento de apenas 4,7%. Esse cenário de arrefecimento dos investimentos pode ser explicado pela desaceleração do consumo e do próprio investimento, tanto devido ao desaquecimento do mercado interno como da piora do mercado internacional. Dessa forma, o PIB, que havia crescido 7,5% em 2010, apresentou uma queda no ritmo de crescimento, registrando uma variação de apenas 2,7% em 2011 (IPEADATA).

Nesse contexto de arrefecimento da atividade econômica o ritmo de crescimento do emprego formal conforme a RAIS foi bastante afetado, a despeito das taxas ainda bastante favoráveis. A variação média de 35,9% entre 2003 e 2008, ou 6,3% ao ano, deu lugar a um crescimento de 22,5% entre 2008 e 2013, o que significou uma variação média anual de 4,1%. Como já indicado acima, observando a composição setorial do emprego formal, o pior desempenho dos indicadores do emprego ficaram com o segmento da indústria de transformação, com variação significativa do emprego formal no primeiro período (40,0%) e forte retração no segundo momento (9,6%), reflexo da perda de dinamismo da demanda agregada, bem como da transformação do cenário externo, desde a crise de 2008, num ambiente de forte acirramento da concorrência internacional, considerando ainda um câmbio que dificultou a competitividade externa dos produtos nacionais. Sendo assim, a contribuição da manufatura para a geração de emprego formal, tendo sido a segunda mais elevada de todos os setores de atividade em 2008, chegando a quase 20,0% de contribuição com mais de 2,0 milhões de empregos gerados, apresentou recuo de 12,1 pontos percentuais, em 2013.

Nesse cenário, a continuidade da elevação das taxas de emprego, ainda que em ritmo inferior ao período anterior à crise, fora sustentada pelos setores não *Tradables.* Conforme dados da RAIS*,* além da administração pública, as contribuições mais significativas foram dos segmentos de Comércio e reparação, Atividades imobiliárias, Construção Civil, Transporte, armazenagem e comunicação e Alojamento e alimentação, que em conjunto contribuíram com 66,0% para a geração de emprego formal entre 2008 e 2013. Se considerarmos também a administração pública a este cálculo, teremos que a contribuição destes setores ao crescimento do emprego formal foi de 78,0%.

De qualquer forma, levando em conta os dez anos analisados, a despeito do arrefecimento do ritmo de crescimento dos indicadores após 2008, o emprego formal e a formalização das empresas e dos contratos de trabalho cresceram expressivamente, ultrapassando as taxas de crescimento do PIB ao longo do período. Entre 2003 e 2008 houve excelente desempenho da maioria doa setores de atividade, até mesmo da indústria de transformação, apesar do câmbio desfavorável. Já no segundo momento, entre 2008 e 2013 esse processo fora sustentado pelos setores não Tradables, bastante beneficiados ao longo dos dez anos, pela alteração do modo de funcionamento da economia, como resultado de uma conjunção de fatores promotores de uma importante alteração econômica e institucional, favorecendo o crescimento com inclusão social. Cabe chamar atenção ainda para a maior atuação sindical e a mudança de postura do governo brasileiro, através da ampliação das políticas públicas mais favoráveis a base da pirâmide social, bem como da maior fiscalização.

Nesse processo, houve uma importante alteração da sociedade brasileira, com consequências positivas no sentido da tendência de estruturação da economia e do mercado de trabalho, o que permitiu um crescimento mais inclusivo. Contudo, após 2014, em virtude de transformações políticas e do aprofundamento da crise econômica, vem ocorrendo uma rápida reversão das condições favoráveis para o emprego e a renda, indicando um possível retrocesso no mercado de trabalho brasileiro. Esse cenário será tratado no item a seguir, a partir da análise do emprego formal com os últimos dados das principais regiões metropolitanas, conforme a Pesquisa Mensal de Emprego (Monthly Employment Survey, PME), bem como com dados da Pesquisa Nacional por Amostra de Domicílio Contínua (Continuous National Household Sample Survey, PNADC).

*2 A reversão do emprego formal nos anos recentes*

A quantidade de vínculos de emprego formal no Brasil vinha se desenvolvendo rapidamente desde 2003/2004, com taxas de crescimento que excediam as taxas de crescimento do PIB, apontando para um processo de reestruturação do mercado de trabalho no país. Entre dezembro de 2003 e dezembro de 2014, segundo a RAIS, a quantidade de vínculos de emprego formal no país havia crescido 67,8%, ou cerca de 5,0% ao ano. Durante a confecção do presente texto, os últimos dados disponíveis da RAIS referiam-se ao ano de 2014; no entanto, dados amostrais da PME e, especialmente, da PNAD contínua (PNADC)[[11]](#endnote-12), apontam para uma inflexão nesta tendência, rompendo com um processo, até então contínuo, de crescimento do emprego formal e diminuição do desemprego.

Apesar da retração da tendência de crescimento econômico que se esboça desde 2011, o crescimento do emprego formal continuou positivo até pelo menos o biênio 2013/2014, quando as taxas de crescimento começaram a decrescer para, em 2015, se tornarem negativas. Conforme explicitado anteriormente, sobretudo após 2011, iniciou-se um processo de arrefecimento da atividade econômica, o que resultou em desaceleração do ritmo de crescimento do emprego formal. De acordo com os dados da PME, o emprego formal nas regiões metropolitanas, que entre 2010 e 2011 cresceu 6,1% e vinha de uma tendência ascensional, salvo o breve intervalo da crise externa entre o final de 2008 e o primeiro semestre de 2009, passou a registrar um movimento de desaceleração, apresentando crescimento de 5,0% entre 2011 e 2012, 2,4% entre 2012 e 2013 e 1,9% entre 2013 e 2014. Essa tendência de desaceleração rapidamente se transformou em um movimento de queda entre 2014 e 2015, registrando uma taxa negativa de 1,2%. O dado consolidado mais recente, de fevereiro de 2016, aponta uma continuidade desse movimento, com uma taxa negativa de 0,5%, indicando um processo de reversão da tendência de estruturação do mercado de trabalho brasileiro que vinha se configurando desde 2003.

Assim, em comparação com os subperíodos 2003-2008 (pré-crise financeira mundial) e 2008-2013 (pós-crise financeira mundial), os últimos anos apontam para um movimento de inflexão que vem ocorrendo no mercado de trabalho brasileiro após 2013. O conjunto do período compreendido entre os meses de fevereiro de 2013 e fevereiro de 2016 mostram que em três anos a evolução do emprego formal metropolitano está muito aquém do que precisaria para alcançar resultados semelhantes aos dos subperíodos anteriores (ver Tabela 1, abaixo).

*Tabela 1 aqui*

Os dados da PME corroboram a afirmação de que os setores de não *Tradables* foram os que mais contribuíram para o crescimento do emprego formal no período 2003-2013. No subperíodo compreendido entre 2003 e 2008, o emprego formal nas regiões metropolitanas cresceu cerca de 20%, sendo fortemente influenciado pelos setores de intermediação financeira, atividades imobiliárias e, especialmente, como veremos adiante, serviços às empresas, que contribuíram com 31% do crescimento do emprego formal metropolitano no período, pelos setores de administração pública e serviços sociais, que contribuíram com 21,4%, e comércio e reparação, que contribuíram com 16,2%. Além destes setores, outro setor em que o emprego formal cresceu bastante foi na construção civil, que só não teve maior contribuição ao crescimento geral porque representava uma porcentagem menor do total do emprego formal geral (4,1% em 2008). É notório o fato de que, nas regiões metropolitanas, a maior parte do emprego é normalmente gerada pelos setores de comércio, construção civil e, principalmente, serviços, setores tipicamente das áreas urbanas, e de grande peso nas metrópoles.

No subperíodo compreendido entre fevereiro de 2008 e fevereiro de 2013, o emprego formal metropolitano cresceu com vigor ainda mais acentuado, registrando variação de 24,6%. Aumento superior ao registrado para o país como um todo a partir dos dados da RAIS, que foi de 22,5%, apontando para o melhor desempenho das atividades urbanas, mais ligadas a comércio e serviços que, como os números comprovam, sustentaram o avanço do emprego nessa fase, ao contrário da manufatura, bastante prejudicada com a reversão do cenário externo após a crise internacional.

Como mencionado na primeira parte deste artigo, a rápida ação do governo brasileiro para preservar o crédito e o consumo, além dos subsídios fiscais oferecidos às indústrias de bens de consumo durável, resultaram em uma rápida retomada da atividade econômica, de forma que aqueles setores que mais contribuíam para o crescimento do emprego formal tiveram seu papel acentuado no período pós-crise, além de “blindar” a economia brasileira dos efeitos mais imediatos da crise externa. No subperíodo em questão, os setores ligados a serviços diversos, como intermediação financeira, atividades imobiliárias e serviços às empresas; outros serviços (serviços em geral) e os setores de administração pública e serviços sociais haviam contribuído, juntos, com 59% do crescimento do emprego formal. Por outro lado, os setores de comércio e reparação e a construção civil, que no período anterior haviam contribuído juntos com 21% do crescimento do emprego formal, entre 2008 e 2013 contribuíram com 26,4% do crescimento.

Com efeito, os dados da PME demonstram que os setores que mais contribuíram com o crescimento do emprego formal até o ano de 2014 foram os grandes setores de comércio e reparação, serviços de um modo geral e a construção civil; ou seja, os principais setores que ajudaram o emprego formal a registrar taxas de crescimento tão altas nestes anos foram os setores não *Tradables*. Como já analisado, esse desempenho dos não *Tradables*, e as consequências para o mercado de trabalho, destacando o elevado crescimento do emprego formal, teve forte relação com um determinado modo de funcionamento da economia baseado no real valorizado por longo período, o que possibilitou uma inflação relativamente baixa e a elevação do poder de compra dos salários, que somados aos ganhos salariais referentes aos reajustes das categorias e a política de valorização do salário mínimo, permitiram a dinamização do consumo e a demanda doméstica.

Cabe ressaltar, no entanto, o importante papel que a indústria[[12]](#endnote-13) de um modo geral teve neste processo de crescimento do emprego formal. Segundo os dados da PME, no primeiro subperíodo os setores da indústria registraram crescimento de 12,3% do emprego formal, e contribuíram com 13,6% do crescimento geral do emprego formal. No subperíodo seguinte, de 2008 a 2013, estes setores cresceram 16,6%, com contribuição de 14% do crescimento geral. Ainda assim, a indústria de transformação, especialmente aquela que concorre com os importados, que, conforme a RAIS, já havia sinalizado a perda de força na geração de emprego após a crise externa de 2008[[13]](#endnote-14), teve um papel significativo para explicar a reversão da tendência de crescimento do emprego formal, no período recente.

A forte reversão que a tendência de crescimento do emprego formal sofreu nos últimos três anos fica evidente nos dados da PME. Entre fevereiro de 2013 e fevereiro de 2016, o emprego formal nas regiões metropolitanas praticamente se estagnou, registrando um crescimento de 0,1%. A análise setorial nos mostra que os principais setores responsáveis pela quebra da tendência de crescimento foram exatamente os setores ligados à indústria em geral e à construção civil, setores que em anos anteriores haviam contribuído significativamente para o crescimento do emprego formal, embora não tivessem sido os principais. Os setores da indústria foram os que mais contribuíram para a estagnação do crescimento do emprego formal metropolitano, com uma queda de 16,9% entre fevereiro de 2003 e fevereiro de 2016, ao passo que o emprego formal na construção civil, setor que registrou forte crescimento nos períodos anteriores, caiu 13,2% no mesmo período.

De fato, os anos recentes tem sido desastrosos para o emprego formal, especialmente na indústria e na construção. Os dados da PME mostram que estes setores foram os únicos em que a evolução do emprego formal apresentou resultados sistematicamente negativos, acompanhando de perto a retração econômica que se desenhava em 2014 e se aprofundou em 2015. A indústria como um todo diminuiu sua quantidade de emprego formal em 2,5%, 7,7% e 7,6% em 2014, 2015 e 2016, respectivamente. Já a queda mais significativa no emprego formal da construção civil começou em 2015, com uma queda de 9,2%, e se arrefeceu um pouco em 2016, registrando queda de 4,2% (ver Tabela 2, abaixo). Não por acaso, o PIB do ano de 2015 foi o pior em toda a série histórica analisada.

*Tabela 2 aqui*

Ainda assim, apesar de positivos, os resultados nos outros setores também não foram animadores, uma vez que suas taxas de crescimento apresentaram resultados aquém do anteriormente registrado. Chama-se a atenção para a única exceção neste subperíodo de 2013 e 2016, que foi o setor de administração pública e serviços sociais, que registrou crescimento de 4,8% entre 2013 e 2014, refletindo possivelmente o esforço do governo de expandir os serviços sociais públicos, como saúde e educação, especialmente diante de um forte quadro de desaceleração econômica. Além do mais, destacam-se nestes anos o crescimento dos setores de comércio e reparação e serviços às empresas, que tiveram crescimento de 2,4% e 3,0%, respectivamente. Graças ao crescimento do emprego nestes setores, o emprego formal metropolitano em geral, entre os anos de 2013 e 2014, apresentou uma taxa de crescimento positiva, ainda que em ritmo decrescente. De toda forma, com o forte arrefecimento da demanda agregada, que se aprofundou a partir de 2014, o mercado de trabalho metropolitano vem sofrendo sistematicamente, o que resultou em uma quantidade de vínculos formais praticamente estagnados na comparação entre 2003 e 2016. Tal resultado só não é mais preocupante devido ao movimento de retração da PEA nas áreas metropolitanas de 1,7%, ao longo dos 13 anos analisados.

Para uma análise mais ampla do mercado de trabalho brasileiro nos últimos anos foram utilizados os novos dados da PNAD contínua (PNADC), possibilitando compreender melhor o fenômeno da retração do emprego formal para o conjunto do país, como segue na Tabela 3 (a seguir). Segundo a pesquisa da PNADC, não apenas o emprego formal[[14]](#endnote-15), como o emprego em geral, vêm registrando contínua retração, especialmente frente ao crescimento da taxa de desemprego. Como já demonstrado com os dados da PME, os dados trimestrais da PNADC apontam que o emprego em geral seguiu crescendo até, pelo menos, o segundo trimestre de 2014, quando se iniciou a reversão do crescimento do emprego geral e, em especial, do emprego formal.

Segundo a PNADC, o emprego geral seguiu crescendo até o segundo trimestre de 2014, registrando uma variação de 3,4% (equivalente a um crescimento trimestral de 0,6%) entre o primeiro trimestre de 2013 e o segundo trimestre de 2014, enquanto que o emprego formal registrou um crescimento de 5,3% (equivalente a um crescimento trimestral de 0,9%) para o mesmo período. Após o segundo trimestre de 2014 a quantidade de vínculos de emprego, tanto do emprego geral quanto do emprego formal, passam a sofrer fortes quedas, registrando diminuição de 4,7% (equivalente a uma queda trimestral de 0,6%) e 4,5% (equivalendo a uma queda trimestral também de 0,6%) entre o segundo trimestre de 2014 e o primeiro trimestre de 2016, respectivamente. Esta tendência de deterioração gradual do mercado de trabalho que se esboça desde 2014 pode ser observada de modo mais geral na Tabela 3, abaixo.

*Tabela 3 aqui*

Entre o primeiro trimestre de 2013 e o segundo trimestre de 2014, o emprego formal seguiu crescendo continuamente, sem interrupções, acompanhando o crescimento do PIB, pelo menos até o primeiro trimestre de 2014. Salvo características sazonais da série, observa-se que no ano de 2013, apesar do baixo crescimento do PIB e da deterioração do emprego nos setores de indústria e construção civil (vistos anteriormente), o emprego formal continuou em ascensão, mesmo que em um ritmo bastante baixo. O desemprego, mesmo com a elevação sazonal verificada no início de cada ano, manteve-se relativamente baixo, não ultrapassando 8% e chegando a alcançar o menor valor do período coberto pela PNADC, 6,2% no quarto trimestre de 2013.

Apesar da desaceleração já verificada, tanto do PIB quanto do emprego formal, o ano de 2013 ainda apresentou um comportamento razoável para a atividade econômica e especialmente para o mercado trabalho, aspectos positivos que começam a se reverter no ano de 2014. No primeiro trimestre de 2014 houve um forte aumento do desemprego (16,5%) e uma acentuada queda do emprego em várias modalidades de emprego (conta-própria, auxiliares familiares e informais), com a única exceção para o emprego formal, que se manteve crescendo. Esse comportamento do mercado de trabalho nos primeiros meses do ano, provavelmente, tem um componente de sazonalidade, porém, a perda de vigor da atividade econômica refletiu num crescimento modesto do emprego formal que, associado à retração das outras posições na ocupação, resultou num crescimento forte do desemprego. A partir do segundo trimestre de 2014, os resultados trimestrais do PIB foram continuadamente negativos, transformando a tendência de desaceleração da economia em recessão[[15]](#endnote-16) e contribuindo para o pífio resultado anual de 0,1%. Ainda que a taxa de desemprego tenha se mantido relativamente baixa ao longo do ano, o emprego formal só conseguiu apresentar variação positiva até o segundo semestre de 2014, a partir do qual passou a ter uma trajetória de queda que vem se mantendo praticamente até 2016.

Como mostram os dados, é importante destacar aqui os reflexos da crise, inaugurando um movimento de reversão daquela tendência estruturante do mercado de trabalho que vinha se dando até o começo de 2014. Na análise trimestral é possível verificar que a partir do terceiro trimestre de 2014, quando o emprego formal apresentou uma sequência de resultados negativos, a modalidade dos trabalhadores por conta-própria registra números sempre positivos, chegando no último trimestre de 2015 com o melhor resultado comparativamente às outras posições na ocupação, indicando o crescimento das estratégias de subsistência diante da piora do mercado formal de trabalho.

Os números do ano de 2015 apenas corroboram a afirmação de que o ano de 2014 inaugurou uma tendência recessiva na economia brasileira, registrando resultados trimestrais do PIB cada vez mais negativos, chegando a apresentar uma queda de 5,9% no quarto trimestre de 2015 e contribuindo para uma forte queda anual de 3,8%. Neste ano, o emprego formal assumiu uma trajetória constantemente negativa, registrando quedas de até 1,1% e uma breve estagnação no quarto trimestre, e o desemprego ultrapassou a faixa dos 8%, chegando a 9% no último trimestre. O primeiro trimestre de 2016 aponta o aprofundamento desta tendência, registrando um forte recuo do emprego em geral. Conforme já apontado, a sazonalidade dos primeiros meses do ano está presente nesse comportamento, contudo, o quadro recessivo atingiu mais fortemente o emprego formal, que registrou um recuo de 1,7%. As modalidades menos protegidas, como o emprego informal e o familiar auxiliar, registraram quedas ainda maiores, de 4,3% e 6,7%, respectivamente. Esse desempenho tem a ver, por um lado, com a recessão econômica que implica na queda do emprego em geral, mas também com a maior dificuldade de aumento dos empregos menos protegidos, em um ambiente institucional que se desenvolveu ao longo dos anos de maior proteção do trabalho. Seja pelo crescimento da formalização dos estabelecimentos, seja pela maior atuação sindical e das instituições públicas de proteção do trabalho. Nesse cenário, e diante da retração do mercado formal de trabalho, ocorre um crescimento do trabalho por conta-própria e do desemprego, que vem alcançando proporções que não são vistas desde o início dos anos 2000, chegando a quase 11% da Força de Trabalho.

Para o melhor entendimento do movimento apontado acima, de deterioração da economia e do mercado de trabalho, com ênfase no emprego formal, a análise a seguir procura ampliar a investigação, a partir dos dados da PNADC, observando a composição setorial do emprego formal. O estudo confirma as conclusões já apontadas pela pesquisa da PME. Ou seja, que os principais setores que mais contribuíram para os piores resultados do emprego formal dos últimos anos foram os setores da Indústria e a Construção, muito embora os dados apontem que a desestruturação do mercado de trabalho esteja rapidamente se alastrando por todos os setores de atividade da economia, mesmo aqueles que mais cresceram nos últimos anos e que estavam relativamente protegidos da concorrência e da volatilidade do mercado externo, como Comércio e Serviços.

*Tabela 4 aqui*

Os dados da Tabela 4, acima, demonstram que a evolução do emprego formal no ano de 2013, embora positiva de modo geral, teve momentos de retração, especialmente nos setores de administração pública e entre os serviços domésticos. Na administração pública, pode-se chamar a atenção para a queda na arrecadação, o que limitou o crescimento dos gastos públicos, enquanto que a queda na quantidade de vínculos de emprego formal no setor de serviços domésticos pode ter refletido muito mais a migração de trabalhadores deste setor para outros setores do que uma desestruturação em si. No geral, o ano de 2013 apresentou crescimento moderado do emprego formal, mas ainda assim positivo, especialmente entre aqueles setores que abrigam maiores proporções do emprego formal geral, como Comércio, Indústria e, especialmente, serviços sociais e administrativos, que continuaram registrando resultados positivos, ainda que decrescentes.

Na análise setorial do emprego formal, sua reversão também fica clara a partir do terceiro trimestre de 2014, quando mais setores passaram a apresentar variações negativas em suas quantidades de vínculos de emprego formal. Note-se a variação de setores de importante representatividade, como Construção civil, que apresentaram fortes quedas entre o segundo e o terceiro trimestres de 2014, 4,4% e 6,4%, respectivamente, e a administração pública, com uma forte queda no quarto trimestre, de 8,2%. Apesar destes resultados negativos, estes setores não representam ainda a maior parte do emprego formal (que está localizado, sobretudo, nos setores de comércio e serviços), de modo que o desemprego ainda se manteve bastante baixo no ano de 2014, como verificado na Error: Reference source not found 3. Ainda assim, foram resultados suficientemente significativos para delimitar o rompimento de uma tendência de estruturação do mercado de trabalho que vinha inalterada, até mesmo após a crise de 2008, quando o emprego formal continuou numa trajetória de crescimento, ainda que em ritmo menor.

O ano de 2015 marca definitivamente a inflexão que o mercado de trabalho vem sofrendo nos últimos meses. Praticamente todos os setores passaram por trimestres de crescimento negativo do emprego formal, alguns com quedas bastante acentuadas, como o emprego formal na Indústria, que caiu 3,6% no terceiro trimestre e 4,9% no quarto trimestre, e no setor de Transporte, Armazenagem e Correios, que caiu 3,8% no quarto trimestre de 2015. Além destes, chama-se a atenção para a continuidade da forte queda no emprego formal pela qual passou a construção civil, com mais de 11% de retração no segundo trimestre - a despeito do forte crescimento de 14,1% que teve no quarto trimestre, o que ajudou a segurar o resultado geral deste no ano de 2015 -, e os serviços administrativos, com uma queda de 10,5% no quarto trimestre de 2015. Apesar da diferença entre as amostras da PME (emprego formal urbano e maiores de 11 anos) e da PNAD (emprego formal geral e maiores de 14 anos), pode-se observar como os dados do emprego formal de uma e de outra pesquisa apontam para o mesmo processo de desestruturação do mercado de trabalho no ano de 2015: destruição de vagas formais e crescimento de alternativas de ocupação nitidamente como estratégia de subsistência como a dos trabalhadores por conta-própria, além do aumento do desemprego.

Por fim, observando os setores de atividade, os dados do primeiro trimestre de 2016 apontam para um aprofundamento da desestruturação do mercado de trabalho com aumento do desemprego em setores estratégicos e com forte capacidade de retroalimentação da demanda agregada, como a indústria de transformação e a construção civil, impactando na retração da atividade em geral e, portanto, na queda do emprego dos outros segmentos. Estes setores, sendo bastante vulneráveis às incertezas políticas e econômicas, e ao desmonte da capacidade de investimento do Estado, que vem ocorrendo nos últimos anos, contribuem fortemente para queda do ritmo de investimento e desaceleração da demanda agregada, afetando o emprego formal em geral. A construção civil foi a mais afetada, passando a empregar 6,3% trabalhadores formais do que o trimestre anterior, seguida da indústria de transformação, com 5,1% a menos. Sobre o reflexo nos outros setores, por exemplo, se deve chamar a atenção para a forte queda do emprego formal no setor de transporte, refletindo a queda na produção e na demanda experimentada pela atividade econômica em geral.

*Tabela 5 aqui*

Outros setores apresentaram queda menos acentuada do emprego formal, embora ainda alta, de 2,2% para o caso do comércio, ou ainda elevação mais moderada, como o crescimento de 2,2% nos serviços administrativos. Tais setores também serão atingidos caso a crise se prolongue, afetando estes que foram os segmentos onde o emprego formal mais cresceu na última década (Souza Campos, 2016). O emprego no comércio e nos serviços é altamente dependente do consumo e da demanda internos, de modo que a continuidade do processo recessivo, realimentando a retração do emprego na indústria e na construção civil, rapidamente agravará a queda da demanda agregada, ampliando os níveis de desemprego nestes setores. Este aumento do desemprego, guardadas as devidas proporções, ocorrerá de modo similar ao que vemos hoje na indústria e na construção civil, setores que também tiveram grande importância no crescimento do emprego formal verificado no período anterior, mas afetará mais profundamente o mercado de trabalho como um todo, pois comércio e serviços administrativos, que já apresentavam alta participação relativa na estrutura ocupacional no início dos anos 2000, foram os segmentos onde o emprego formal mais cresceu até 2014.

De um modo geral, o emprego formal foi mais afetado no período posterior ao segundo trimestre de 2014 do que no período compreendido do primeiro trimestre de 2013 ao primeiro trimestre de 2014 (ver Tabela 5). Enquanto o emprego formal em geral cresceu 5,3% entre o primeiro trimestre de 2013 e o primeiro trimestre de 2014, do segundo trimestre de 2014 ao primeiro trimestre de 2016 o emprego formal caiu 4,5%, representando um saldo positivo de apenas 0,5% entre os primeiros trimestres de 2013 e 2016. Em suma, até o momento, a retração da tendência de crescimento do emprego formal praticamente zerou os ganhos obtidos, pelo menos, desde 2013. Este resultado, como já dito, teria se dado principalmente em função dos setores de indústria e construção civil, com quedas de 14,9% e 15,4% entre o segundo trimestre de 2014 e o primeiro trimestre de 2016, respectivamente, e os setores de serviços administrativos e a administração pública, com quedas de 9,3% e 13,1%, respectivamente.

*Conclusão*

O forte processo de crescimento do emprego formal e a queda dos níveis de desemprego que caracterizaram o período entre 2003-2013 foram minados por um arrefecimento do crescimento econômico que já vinha se desenhando, pelo menos, desde 2011/2012, associado, é claro, a uma conjuntura social e política problemática que se instaurou a partir de 2013. O arrefecimento do crescimento econômico criou as condições para que os setores mais sensíveis à conjuntura política fossem afetados pelos escândalos políticos e a onda conservadora que tomou o país desde 2013, como é o caso do setor petrolífero e da construção civil – com efeitos multiplicadores consideráveis –, profundamente abalados com os escândalos da operação Lava-Jato. Diante da incerteza política e econômica, dados os efeitos multiplicadores desses segmentos, a retração dos mesmos implicou numa reação em cadeia, resultando na forte desaceleração e mesmo cancelamento de uma série de investimentos em outros setores. Por outro lado, a queda na arrecadação fiscal, decorrente do arrefecimento da economia com a queda da demanda agregada e do emprego, impossibilitaram o governo de tomar medidas anticíclicas mais eficientes contra a crise, resultando em um quadro de agravamento das condições econômicas, políticas e, especialmente, institucionais que culminou no processo de impeachment da presidenta da república, Dilma Rousseff, sem lugar à dúvida, caracterizando um golpe de Estado de caráter político-jurídico. Estes elementos estão condicionando a tendência recente de reversão da trajetória de estruturação do mercado de trabalho brasileiro, de modo que é no crescimento do desemprego e das outras posições na ocupação, que não o emprego formal, que se anuncia um profundo processo de retrocesso social. Não obstante, esta estruturação do mercado de trabalho significou um dos principais pilares do avanço social verificado no período 2003 – 2013.

Os últimos dados apresentados pela PNADC para os últimos três anos demonstram que, por um lado, a administração pública foi um dos setores mais afetados por esta nova conjuntura, pois foi fortemente impossibilitada de continuar, pelo menos no mesmo ritmo de antes, a expansão dos serviços sociais públicos que tanto contribuíra direta e indiretamente com o crescimento do emprego formal. Por outro lado, a impossibilidade de continuar investimentos estruturantes, especialmente as grandes obras de infraestrutura, aliada às denúncias de corrupção entre as mais importantes empresas de construção civil do país, criaram um verdadeiro entrave à continuidade de crescimento dos setores envolvidos, criando as condições para o arrefecimento do crescimento do emprego (especialmente do emprego formal).

A queda no consumo, diante da conjuntura recessiva, do crescimento do endividamento, do encarecimento do crédito e da inflação em alta, associada à conjuntura política adversa, afetou diretamente a demanda por bens duráveis, especialmente aqueles de alto valor unitário, como automóveis e eletrodomésticos, impactando diretamente a indústria de transformação, já bastante abalada com a retração dos investimentos desde a crise internacional de 2008. Por fim, este contexto provocou uma expressiva queda da demanda das empresas prestadoras de serviços às outras empresas, de modo que este importante setor empregador logo se tornou mais um dos fortemente afetados pela crise, situação que tende a se agravar segundo os dados da PNADC, caso a crise se prolongue.

Estas transformações conjunturais, econômicas e políticas, portanto, criaram as condições para o rompimento da tendência estruturante pela qual o mercado de trabalho brasileiro e a base da pirâmide social vinham passando desde o início do século, interrompendo o crescimento do emprego formal e possibilitando o crescimento das formas mais precárias de subsistência e mesmo das taxas de desemprego. Caso o país não possa superar o rompimento institucional da democracia e enfrentar a agenda regressiva e reacionária em curso, caracterizada pelo ataque frontal dos interesses conservadores a todas as conquistas sociais e trabalhistas inscritas na Constituição de 1988, a crise se aprofundará e tenderá a ser duradoura, de forma que os níveis de desemprego crescerão ainda mais, além do aumento das formas mais precárias de ocupação, causando a ruptura definitiva do processo de crescimento econômico com inclusão social que vínhamos experimentando no país há mais de uma década.

*Bibliografia*

Baltar, Paulo Eduardo de Andrade

2010“Emprego, políticas de emprego e política econômica no Brasil” Série Trabalho Decente no Brasil. Documento de trabalho nº2. Escritório da OIT no Brasil. Brasília: OIT. http://www.oit.org.br/sites/default/files/topic/employment/ pub/politicas_emprego_242.pdf (accessed October 21, 2016)

Baltar, Paulo Eduardo de Andrade; Santos, Anselmo Luis; Krein, José Dari; Leone, Eugenia Troncoso; Proni, Marcelo Weishaupt; Moretto, Amilton José; Maia, Alexandre Gori and Salas, Carlos Páez

2010 “Trabalho no governo Lula: uma reflexão sobre a recente experiência brasileira” Global Labour University Working Papers. Paper nº 9. https://www.econstor.eu/bitstream/10419/96388/1/glu-wp_no-9-ptg.pdf (accessed October 21, 2016)

Barbosa, Nelson and Souza, José Antonio Pereira de

2010 “A inflexão do governo Lula: política econômica, crescimento e distribuição de renda” In Emir Sader and Garcia, Marco Aurélio (Eds.) *Brasil entre o passado e o futuro*. São Paulo: Boitempo e Editora Fundação Perseu Abramo https://nodocuments.files.wordpress.com/2010/03/barbosa-nelson-souza-jose-antonio-pereira-de-a-inflexao-do-governo-lula-politica-economica-crescimento-e-distribuicao-de-renda.pdf (accessed October 23, 2016)

Cardoso Júnior, José Celso

2007 “De volta para o futuro? As Fontes de recuperação do emprego formal no Brasil e as condições para a sua sustentabilidade temporal” Texto para discussão nº 1310. Brasília: IPEA. http://repositorio.ipea.gov.br/bitstream/11058/1417/1/ TD_1310.pdf (accessed October 21, 2016)

Cardoso Júnior, José Celso and Hamasaki, Cláudia Satie

2014 “Padrões de desenvolvimento, mercado de trabalho e proteção social: a experiência brasileira entre as décadas liberal (1990) e desenvolvimentista (2000)” Texto para Discussão nº 2021. Brasília: IPEA. http://repositorio.ipea.gov.br/ bitstream/11058/3501/1/td_2021.pdf (accessed October 21, 2016)

Castro, Jorge A. de

2013 “Política Social, distribuição de renda e crescimento econômico” In Ana Fonseca and Eduardo Fagnani (Eds.). *Políticas Sociais, desenvolvimento e cidadania*, vol. 1 São Paulo: Editora Fundação Perseu Abramo

DIEESE (Departamento Intersindical de Estatística e Estudos Socioeconômicos)

2012 “A situação do trabalho no Brasil na primeira década dos anos 2000” São Paulo: Departamento Intersindical de Estatística e Estudos Socioeconômicos

Dedecca, Claudio Salvadori and Lopreato, Francisco Luiz Cazeiro

2013 “Brasil: perspectivas do crescimento e desafios do mercado de trabalho” Textos para Discussão nº225. Campinas: Instituto de Economia UNICAMP. http://www.eco.unicamp.br/docprod/downarq.php?id=3319&tp=a (accessed October 21, 2016)

FUNDAP (Fundação de Desenvolvimento Administrativo)

2011 “Intervenções macroprudenciais no mercado de crédito e no mercado de câmbio” *Conjuntura Econômica em Foco, Boletim de Economia* [3]. São Paulo: Fundação de Desenvolvimento Administrativo.

2012 “Desempenho recente da atividade econômica no Brasil: há espaço para acelerar o crescimento?” *Conjuntura Econômica em Foco, Boletim de Economia* [18]. São Paulo: Fundação de Desenvolvimento Administrativo.

IBGE (Instituto Brasileiro de Geografia e Estatística)

2011 “Indicadores IBGE: Contas Nacionais Trimestrais” Brasília: Instituto Brasileiro de Geografia e Estatística.

Krein, José Dari and Santos, Anselmo Luis

2012 “A formalização do trabalho: crescimento econômico e efeitos da política laboral no Brasil” *Nueva Sociedad* nº 239 (especial em português) (may-June) http://nuso.org/media/articles/downloads/3849_1.pdf (accessed October 21, 2016)

Krein, José Dari; Santos, Anselmo Luis; Nunes, Bartira Tardelli

2011 “Trabalho no Governo Lula: avanços e contradições” *Revista da Associação Brasileira de Estudos do Trabalho (ABET)* vol. X, nº 2 (july-december) https://periodicos.ufpb.br/index.php/abet/article/view/15599/8913 (accessed October 23, 2016)

Krein, José Dari and Teixeira, Marilane Oliveira

2014 “As controvérsias das negociações coletivas nos anos 2000 no Brasil” In: Roberto Véras de Oliveira; Maria Aparecida Bridi and Marcos Ferraz (ed.). *O sindicalismo na era Lula: paradoxos, perspectivas e olhares*. 1º Edition. Belo Horizonte: Traço Fino (Trabalho & desigualdade, 18)

Medeiros, Carlos Aguiar de

2015 *Inserção externa, crescimento e padrão de consumo na economia brasileira* Brasília: Instituto de Pesquisa Econômica Aplicada (IPEA)

OIT Brasil (Organização Internacional do Trabalho)

2011 “Uma estratégia inovadora de crescimento com equidade” Escritório da Organização Internacional do Trabalho, Instituto Internacional de Estudos do Trabalho. Genebra: OIT

Oliveira, Tiago

2014 “Trabalho e padrão de desenvolvimento: uma reflexão sobre a reconfiguração do mercado de trabalho brasileiro” Tese de Doutorado, Instituto de Economia – UNICAMP http://www.bibliotecadigital.unicamp.br/document/ ?code=000946848&opt=4 (accessed October 23, 2016)

Santos, Cláudio Hamilton Matos dos

2013 Notas sobre as dinâmicas relacionadas do consumo das famílias, da formação bruta de capital fixo e das finanças públicas brasileiras no período 2004-2012. In: Vanessa Petrelli Corrêa (Ed.) *Padrão de acumulação e desenvolvimento brasileiro*. São Paulo: Fundação Perseu Abramo p. 181-241.

Serrano, Frankiln and Summa, Ricardo

2015 “Demanda agregada e a desaceleração da economia brasileira de 2011 a 2014” Washington, DC: Center for Economic and Policy Research (CEPR)

Souza Campos, Guilherme Caldas de

2015 “A evolução dos salários do emprego formal no Brasil (2003-2013)” *Revista da Associação Brasileira de Estudos do Trabalho (ABET)*, v. 14, nº 2 p. 220-240 http://www.ies.ufpb.br/ojs2/index.php/abet/article/view/27951/15020 (accessed October 23, 2016).

2016 “O emprego formal no Brasil dos anos 2000: um estudo da Relação Anual de Informações Sociais (2003-2013)” Dissertação de Mestrado, Instituto de Economia – UNICAMP http://www.bibliotecadigital.unicamp.br/document/ ?code=000968874&opt=4 (accessed October 23, 2016).

Simão, Ana Rosa Alux

2009 “Sistema de vigilância e fiscalização do trabalho no Brasil: Efeitos sobre a expansão do Emprego formal no período 1999-2007” *Boletim Mercado de Trabalho – Conjuntura e Análise*, v. 39, p. 19-26 Brasília: Instituto de Pesquisa Econômica Aplicada (IPEA)

Souen, Jacqueline Aslan

2013 “A política de salário mínimo no governo Lula” Dissertação de Mestrado, Instituto de Economia – UNICAMP http://www.bibliotecadigital.unicamp.br /document/?code =000907022&opt=4 (accessed October 23, 2016)

*Notas*

1. A Relação Anual de Informações Sociais (RAIS), instituída pelo decreto nº 76.900 de 1975, é um registro administrativo onde os estabelecimentos são obrigados a fazer a sua declaração anual, alimentando o banco de dados do Ministério do Trabalho e Emprego com informações sobre contratações, demissões, escolaridade, horas trabalhadas, salários, tipos de ocupação *etc.* [↑](#endnote-ref-2)
2. A ampliação do crédito foi favorecida pelo aumento do fluxo de capital estrangeiro no mercado doméstico e a maior captação externa de bancos e empresas, em virtude da grande liquidez no mercado financeiro internacional e do diferencial elevado de taxa de juros interna e externa (Baltar *et. all*., 2010). [↑](#endnote-ref-3)
3. Benefícios de Prestação Continuada da Assistência Social (BPC) são benefícios sociais individuais, não vitalícios e intransferíveis, que garantem renda no valor de um salário mínimo à pessoa idosa, com 65 anos ou mais de idade, e à pessoa com deficiência de qualquer idade, que comprovem não possuir meios de se sustentar ou de ser sustentado por sua família. O atual governo brasileiro está tentando desvincular o valor destes benefícios do salário mínimo oficial, o que pode lançar na miséria milhões de brasileiros dependentes destes benefícios. [↑](#endnote-ref-4)
4. O programa Bolsa-Família (“Family Grant”) é um programa focalizado de distribuição de renda para famílias de baixa renda, instituído em 2003. As famílias recebem uma bolsa mediante uma série de condicionalidades como, por exemplo, matricular as crianças na escola e manter suas vacinas em dia, entre outras. O programa é financiado com recursos federais, mas conta com a participação descentralizada de estados e municípios. [↑](#endnote-ref-5)
5. A crise cambial de 1999, que resultou na maxidesvalorização do real, foi enfrentada com um modelo de política econômica baseada em metas de inflação, taxa de câmbio flexível, obtenção de superávits primários e elevada taxa de juros, comumente chamado de modelo do “tripé macroeconômico”. Essa estratégia, associada à conjuntura externa favorável do início da década de 2000 – houve um boom de commodities aliado a um movimento de forte entrada de capitais, estimulada pelo alto diferencial de taxa de juros -, num contexto de abertura comercial e financeira, implicou na valorização de forma continuada do real, a despeito da política de ampliação das reservas internacionais (Baltar, 2010; Barbosa & Souza, 2010). [↑](#endnote-ref-6)
6. Setores *Tradables* são aqueles setores cuja produção e sua comercialização podem ser feitas tanto em território nacional quanto no exterior e, portanto, sofrem concorrência externa direta. Geralmente setores ligados à produção industrial, manufatura e *commodities* podem ser identificados como setores *Tradables*. Por outro lado, setores não *Tradables* são setores cuja produção e comercialização só podem ser feitas localmente, com relativa proteção da competição externa, como por exemplo comércio varejista, construção civil e serviços sociais como saúde e educação. Em termos de emprego e renda, os setores *Tradables*, quando se expandem, podem ou não gerar emprego e renda localmente (podendo também gerar empregos no exterior), enquanto que os setores não *Tradables* empregarão, necessariamente, a força de trabalho doméstica. [↑](#endnote-ref-7)
7. Importante destacar que a tese da flexibilização, por meio da alteração da lei, – bastante presente durante a hegemonia do pensamento liberal dos anos 1990 –, perdeu força com a melhora do mercado de trabalho, sobretudo após 2006, num momento de redefinição do papel do Estado, o que contribuiu para evitar o aprofundamento da fragilidade do nosso sistema de regulação social (Krein, *et. all*, 2011, p. 31). [↑](#endnote-ref-8)
8. Ver dados de comércio exterior conforme a Secretaria de Comércio Exterior/ Ministério do Desenvolvimento Indústria e Comércio (Foreign Trade Secretariat / Ministry of Industry and Trade Development, SECEX/MDIC). [↑](#endnote-ref-9)
9. Calculo computado considerando os setores de atividade conforme a Classificação Nacional de Atividades Econômicas (National Classification of Economic Activities, CNAE 95) – Seção, a saber: Construção civil, Comércio e reparação, Alojamento e alimentação, Transporte e armazenagem, Intermediação financeira, Atividades imobiliárias, Educação, Saúde e serviços sociais, e Serviços coletivos e pessoais (RAIS). [↑](#endnote-ref-10)
10. O Índice de Preços ao Consumidor Amplo (IPCA), usado oficialmente pelo governo para medir a inflação do país, em julho de 2010 era de 0,01%, passando a 0,63% em dezembro. O ano em questão registrou variação de 5,91%, contra uma inflação de 4,31% em 2009, e 6,50% em 2011(IPEADATA). [↑](#endnote-ref-11)
11. A Pesquisa Nacional por Amostra de Domicílios (National Household Sample Survey, PNAD), pesquisa amostral executada anualmente pelo Instituto Brasileiro de Geografia e Estatística (Brazilian Institute of Geography and Statistics, IBGE), explora diversas características socioeconômicas da sociedade brasileira. Desde 2013, o IBGE passou a executar a PNAD trimestralmente, reformulada, através do sistema de acompanhamento de domicílios. Esta nova série da PNAD passou a ser denominada de PNAD contínua (continuous PNAD). [↑](#endnote-ref-12)
12. O setor industrial encontra-se agregado conforme os dados disponíveis da PME. Ver Tabela 2. [↑](#endnote-ref-13)
13. Conforme dados da RAIS, a indústria manufatureira que contribuiu com quase 20% para a geração de emprego formal, com uma taxa de variação de 40,0% no subperíodo entre 2003 e 2008, no momento seguinte, entre 2008 e 2013, a contribuição caiu para 7,8%, com uma elevação do emprego de apenas 9,6%. Observando que esses dados se referem ao emprego formal dos meses de setembro dos referidos anos, o que permite eliminar os efeitos da forte retração do emprego no imediato pós-crise externa, e as possíveis distorções para a análise em questão. [↑](#endnote-ref-14)
14. Na PNADC, compreendemos o emprego formal como sendo a soma dos empregados no setor privado com carteira de trabalho assinada, dos trabalhadores domésticos com carteira de trabalho assinada, dos empregados do setor público com carteira de trabalho assinada, dos militares e dos servidores públicos estatutários. Na PME, não são contabilizados os trabalhadores domésticos com carteira de trabalho assinada. [↑](#endnote-ref-15)
15. Segundo a série do IPEADATA, a última vez que o PIB brasileiro teve um ou mais resultados trimestrais negativos seguidos foi em 2009, por ocasião da crise financeira internacional. Ainda assim, foram apenas os três primeiros trimestres do ano de 2009, sendo que a economia brasileira já começara a apresentar sinais de recuperação ainda no quarto trimestre de 2009. Na atual crise, a recessão já dura dois anos, e o PIB vem registrando quedas cada vez mais acentuadas, configurando uma tendência de aprofundamento da crise. [↑](#endnote-ref-16)
